# Supplementary material for: Homochiral crystallization of single-stranded helical coordination polymers: generated by the structure of auxiliary ligands or spontaneous symmetry breaking
Source: Royal Society of Chemistry journal article supplement (doi:10.1039/c3ce40519b), 2013-01-01
Supplement: c3ce40519b.pdf [file c3ce40519b.pdf]

---

## **SUPPORTING INFORMATION**

### Homochiral crystallization of single-stranded helical coordination polymers: generated by the structure of auxiliary ligands or spontaneous symmetry breaking

*Shuai Ding, Yanfei Gao, Yufei Ji, Yanqin Wang and Zhiliang Liu\**

*College of Chemistry and Chemical Engineering; Key Laboratory of Nanomagnetic and Functional Materials, Inner Mongolia University, Hohhot, 010021, P. R. China.*

**Synthesis.** All reagents and solvents were received from commercial supplies without further purification. (R)-2-amino-1-propanol, (S)-2-amino-1-propanol, 2-aminoethanol, o-vanillin, CuCl<sub>2</sub>, NaN(CN)<sub>2</sub>, NaOH and all the solvents were purchased from Alfa Aesar, respectively. The Schiff base ligands R-H<sub>2</sub>L<sup>1</sup>, S-H<sub>2</sub>L<sup>1</sup>, H<sub>2</sub>L<sup>2</sup> were synthesized according to literature procedures.

**Synthesis of [Cu(R-HL<sup>1</sup>)(μ<sub>1,5</sub>-dca)]<sub>n</sub> (1).** A mixture of CuCl<sub>2</sub>·4H<sub>2</sub>O (0.207 g, 1 mmol), R-H<sub>2</sub>L<sup>1</sup> (0.208 g, 1 mmol), NaN(CN)<sub>2</sub> (0.089 g, 1mmol) and NaOH (0.040 g, 1 mmol) in 20 mL of methanol/ethanol/water (1:2:1) was stirred for 0.5 h. The resulting dark blue solution was left unperturbed to a slow evaporation of the solvent. After three days, dark green block-shaped crystals, suitable for X-ray diffraction analysis, were obtained. Elemental analysis (%): Calc. for C<sub>13</sub>H<sub>14</sub>CuN<sub>4</sub>O<sub>3</sub>: C, 46.22; H, 4.18; N, 16.59. Found: C, 46.53; H, 4.37; N, 16.21. IR (KBr pellet, cm<sup>-1</sup>): 3107<sub>m</sub>, 2318<sub>vs</sub>, 2242<sub>vs</sub>, 2188<sub>vs</sub>, 1641<sub>s</sub>, 1601<sub>m</sub>, 1445<sub>m</sub>, 1322<sub>m</sub>, 1301<sub>m</sub>, 1247<sub>m</sub>, 1027<sub>m</sub>, 975<sub>m</sub>, 871<sub>w</sub>, 742<sub>m</sub>, 630<sub>w</sub>, 567<sub>w</sub>.

**Synthesis of [Cu(S-HL<sup>1</sup>)( μ<sub>1,5</sub>-dca)]<sub>n</sub> (2).** This compound was prepared using the same procedure as that described above for the synthesis of using S-H<sub>2</sub>L<sup>2</sup> in place of R-H<sub>2</sub>L<sup>1</sup>. Elemental analysis (%): Calc. for C<sub>13</sub>H<sub>14</sub>CuN<sub>4</sub>O<sub>3</sub>: C, 46.22; H, 4.18; N, 16.59. Found: C, 46.46; H, 4.32; N, 16.25. IR (KBr pellet, cm<sup>-1</sup>): 3135<sub>m</sub>, 2321<sub>vs</sub>, 2259<sub>vs</sub>, 2200<sub>vs</sub>, 1620<sub>s</sub>, 1587<sub>m</sub>, 1429<sub>m</sub>, 1380<sub>m</sub>, 1289<sub>m</sub>, 1199<sub>m</sub>, 1067<sub>m</sub>, 954<sub>m</sub>, 857<sub>w</sub>, 739<sub>m</sub>, 637<sub>w</sub>, 580<sub>w</sub>.

**Synthesis of [Cu(HL<sup>2</sup>)(μ<sub>1,5</sub>-dca)]<sub>n</sub> (3).** A mixture of CuCl<sub>2</sub>·4H<sub>2</sub>O (0.207 g, 1 mmol), H<sub>2</sub>L<sup>2</sup> (0.193g, 1 mmol), NaN(CN)<sub>2</sub> (0.089 g, 1mmol) and NaOH (0.040 mg, 1 mmol) in 20 mL of methanol/ethanol/water (1:2:1) was stirred for 3 h. The resulting dark blue solution was left unperturbed to a slow evaporation of the solvent. After 24 hours, dark green block-shaped crystals,

suitable for X-ray diffraction analysis, were obtained. Elemental analysis (%): Calc. for  $C_{12}H_{12}CuN_4O_3$  (1): C, 44.51; H, 3.74; N, 17.30. Found: C, 44.19; H, 3.81; N, 17.62. IR (KBr pellet,  $cm^{-1}$ ): 3119 $m$ , 2320 $vs$ , 2252 $vs$ , 2193 $vs$ , 1643 $s$ , 1601 $m$ , 1441 $m$ , 1397 $m$ , 1299 $m$ , 1217 $m$ , 1075 $m$ , 968 $m$ , 856 $w$ , 740 $m$ , 638 $w$ , 573 $w$ .

**Crystallography.** Single crystals of the complexes were selected and mounted on a Bruker ApexII CCD diffractometer with graphite-monochromated Mo-K $\alpha$  radiation ( $\lambda = 0.71073 \text{ \AA}$ ), operating in  $\omega-2\theta$  scanning mode using suitable crystals for data collection. Lorentz-polarization correction was applied to the data. The structure was solved by direct methods (SHELX-97) and refined by full-matrix least-squares procedures on  $F^2$  using SHELX-97. Hydrogen atoms were added theoretically and refined with riding model position parameters and fixed isotropic thermal parameters. Experimental details for the structural determinations are summarized in Table 1S.

**Physical Measurements.** Fourier transform infrared (FTIR) spectra (KBr disk) were measured with a Vertex 70 FTIR on a spectrophotometer (4000–400  $cm^{-1}$ ). Elemental analyses for C, H and N were obtained from a Perkin-Elmer 2400 elemental analyzer. Circular dichroism (CD) spectra were measured as KBr pellet with a J-715 spectropolarimeter in the range of 200–900 nm at 298 K.

Table S1. Crystallographic Data and Structure Refinement for Complexes 1-3.

|                                              | 1                                | 2                                | 3                                |
|----------------------------------------------|----------------------------------|----------------------------------|----------------------------------|
| Empirical Formula                            | $C_{13}H_{14}CuN_4O_3$           | $C_{13}H_{14}CuN_4O_3$           | $C_{12}H_{12}CuN_4O_3$           |
| Formula weight                               | 337.82                           | 337.82                           | 323.80                           |
| Crystal system                               | Orthorhombic                     | Orthorhombic                     | Orthorhombic                     |
| Space group                                  | $P2_12_12_1$                     | $P2_12_12_1$                     | $P2_12_12_1$                     |
| $a$ ( $\text{\AA}$ )                         | 9.586(2)                         | 9.589(2)                         | 9.596(2)                         |
| $b$ ( $\text{\AA}$ )                         | 10.713(2)                        | 10.709(2)                        | 10.990(2)                        |
| $c$ ( $\text{\AA}$ )                         | 13.527(3)                        | 13.528(3)                        | 12.258(3)                        |
| $\alpha, \beta, \gamma$ ( $^\circ$ )         | 90, 90, 90                       | 90, 90, 90                       | 90, 90, 90                       |
| $V$ ( $\text{\AA}^3$ )                       | 1389.1(5)                        | 1389.2(5)                        | 1292.7(4)                        |
| $Z$                                          | 4                                | 4                                | 4                                |
| $T$ (K)                                      | 293(2)                           | 293(2)                           | 293(2)                           |
| $\rho_{\text{caled}}$ ( $g\text{ cm}^{-3}$ ) | 1.615                            | 1.615                            | 1.664                            |
| Abs. coefficient ( $mm^{-1}$ )               | 1.588                            | 1.588                            | 1.702                            |
| $F(000)$                                     | 692                              | 692                              | 660                              |
| $\theta$ Range ( $^\circ$ )                  | $2.43 < \theta < 28.27$          | $2.43 < \theta < 28.28$          | $2.49 < \theta < 27.86$          |
| Reflections collected                        | 10202                            | 10187                            | 13542                            |
| unique reflns, $R_{\text{int}}$              | 3428, 0.0199                     | 3422, 0.0195                     | 3082, 0.0446                     |
| GOF on $F^2$                                 | 1.038                            | 1.027                            | 0.960                            |
| Final R indices [ $I > 2\sigma(I)$ ]         | $R^a = 0.0235$ , $wR^b = 0.0607$ | $R^a = 0.0235$ , $wR^b = 0.0627$ | $R^a = 0.0243$ , $wR^b = 0.0512$ |
| R indices (all data)                         | $R = 0.0272$ , $wR = 0.0623$     | $R = 0.0255$ , $wR = 0.0635$     | $R = 0.0298$ , $wR = 0.0518$     |
| Flack parameter                              | 0.011(10)                        | 0.014(10)                        | 0.009(18)                        |

a)  $R = \sum ||F_o| - |F_c|| / \sum |F_o|$

b)  $wR = [\sum w(F_o^2 - F_c^2)^2 / \sum wF_o^4]^{1/2}$

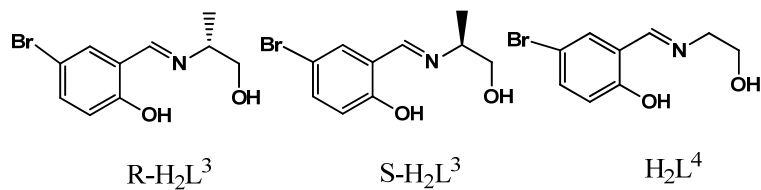

**Scheme S1.** The structures of the bromine-substituted chelate ligands ( $R-H_2L^3$ ,  $S-H_2L^3$ ,  $H_2L^4$ ).

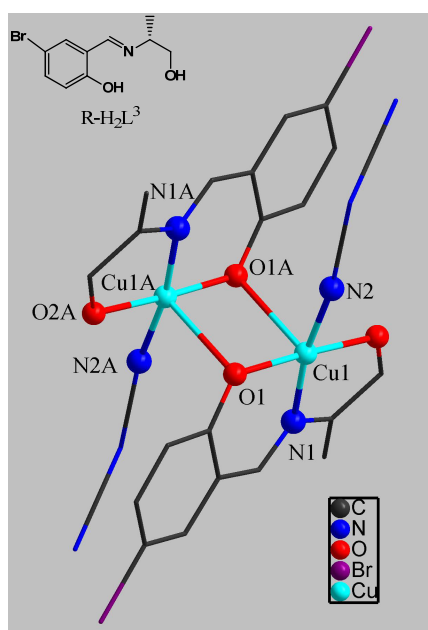

**Figure S1.** A perspective view of structure for  $[Cu(R-HL^3)(N(CN)_2)_2]$  (**4**). Hydrogen atoms are omitted for clarity. Selected bond distances [ $\text{\AA}$ ] and angles [ $^\circ$ ]: Cu1–O1 1.910(6), Cu1–N1 1.932(7), Cu1–N2 1.932(7), Cu1–O2 1.963(7), Cu1–O1A 2.580(7), O1–Cu1–N1 94.3(3), N2–Cu1–O2 91.4(3), N1–Cu1–O2 81.9(3), O1–Cu1–O1A 88.7(3), N2–Cu1–O1A 91.0(3), N1–Cu1–O1A 95.3(3), O2–Cu1–O1 91.8(3) (symmetry code A:  $-x + 2, -y + 1, -z$ ). This compound was prepared using the same procedure as that described above for the synthesis of using  $R-H_2L^3$  in place of  $R-H_2L^1$ . Elemental analysis (%): Calc. for  $C_{24}H_{22}Br_2Cu_2N_8O_4$  (1): C, 37.27; H, 2.87; N, 14.49. Found: C, 37.61; H, 2.55; N, 14.28. IR (KBr pellet,  $\text{cm}^{-1}$ ): 2972 $m$ , 2316 $vs$ , 2255 $vs$ , 2179 $vs$ , 1637 $s$ , 1590 $m$ , 1456 $m$ , 1378 $m$ , 1293 $m$ , 1177 $m$ , 1040 $m$ , 830 $m$ , 796 $w$ , 672 $m$ , 645 $w$ , 550 $w$ .

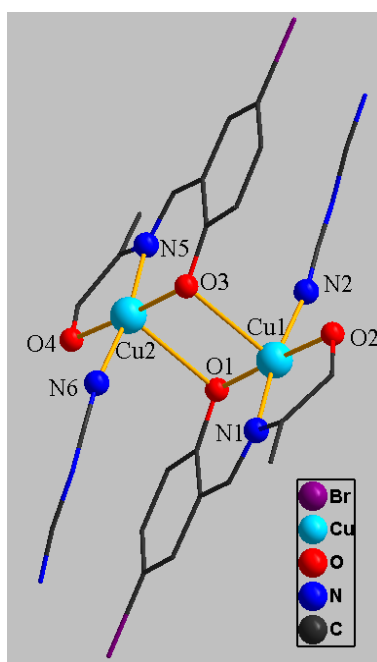

**Figure S2.** A perspective view of structure for  $[\text{Cu}(\text{S-HL}^3)(\text{N}(\text{CN})_2)_2]$  (**5**). Hydrogen atoms are omitted for clarity. Selected bond distances [ $\text{\AA}$ ] and angles [ $^\circ$ ]: Cu1–O1 1.915(10), Cu1–N2 1.949(14), Cu1–N1 1.949(13), Cu1–O2 1.971(11), Cu2–O3 1.914(10), Cu2–N5 1.938(13), Cu2–N6 1.941(14), Cu2–O4 1.960(11), O1–Cu1–N2 92.4(5), O1–Cu1–N1 94.2(5), N2–Cu1–N1 171.2(6), O1–Cu1–O2 176.8(5), N2–Cu1–O2 90.8(5), N1–Cu1–O2 82.6(5), O3–Cu2–N5 94.1(5), O3–Cu2–N6 91.9(5), N5–Cu2–N6 171.0(6), O3–Cu2–O4 175.4(5), N5–Cu2–O4 81.3(5), N6–Cu2–O4 92.7(5). This compound was prepared using the same procedure as that described above for the synthesis of using S-H<sub>2</sub>L<sup>4</sup> in place of H<sub>2</sub>L<sup>1</sup>. Elemental analysis (%): Calc. for C<sub>24</sub>H<sub>22</sub>Br<sub>2</sub>Cu<sub>2</sub>N<sub>8</sub>O<sub>4</sub> (1): C, 37.27; H, 2.87; N, 14.49. Found: C, 37.59; H, 2.66; N, 14.17. IR (KBr pellet, cm<sup>-1</sup>): 3124 $m$ , 2333 $vs$ , 2262 $vs$ , 2183 $vs$ , 1653 $s$ , 1611 $m$ , 1451 $m$ , 1387 $m$ , 1289 $m$ , 1227 $m$ , 1065 $m$ , 948 $m$ , 866 $w$ , 730 $m$ , 628 $w$ , 563 $w$ .

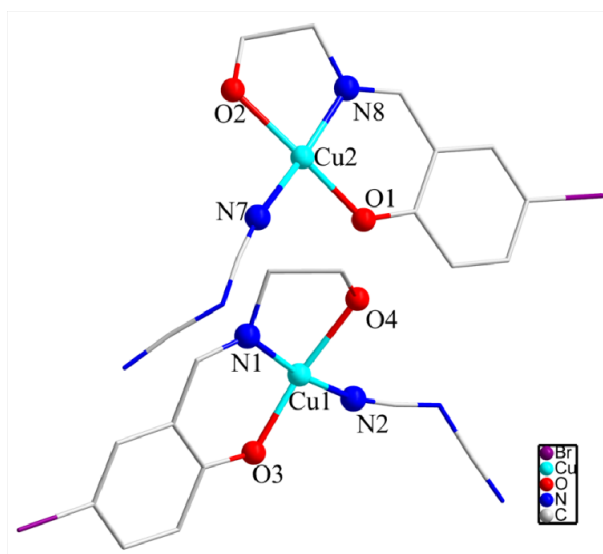

**Figure S3.** A perspective view of structure for  $[\text{Cu}(\text{HL}^4)(\text{N}(\text{CN})_2)_2]$  (**6**). Hydrogen atoms are omitted for clarity. Selected bond distances [ $\text{\AA}$ ] and angles [ $^\circ$ ]: Cu1–O3 1.8829(15), Cu1–N1 1.9205(18), Cu1–N2 1.943(2), Cu1–O4 2.0256(17), Cu2–O1 1.8796(16), Cu2–N8 1.9160(18), Cu2–N7 1.947(2), Cu2–O2 2.0212(18), O3–Cu1–N1 94.07(7), O3–Cu1–N2 94.56(8), N1–Cu1–O4 82.72(7), N2–Cu1–O4 90.07(8), O1–Cu2–N8 94.72(8), O1–Cu2–N7 91.45(9), N8–Cu2–O2 82.41(8), N7–Cu2–O2 92.66(9). This compound was prepared using the same procedure as that described above for the synthesis of using  $\text{H}_2\text{L}^3$  in place of  $\text{H}_2\text{L}^1$ . Elemental analysis (%): Calc. for  $\text{C}_{22}\text{H}_{18}\text{Br}_2\text{Cu}_2\text{N}_8\text{O}_4$  (1): C, 35.45; H, 2.43; N, 15.03. Found: C, 35.10; H, 2.61; N, 14.89. IR (KBr pellet,  $\text{cm}^{-1}$ ): 2964 $m$ , 2307 $vs$ , 2252 $vs$ , 2187 $vs$ , 1636 $s$ , 1521 $m$ , 1458 $m$ , 1375 $m$ , 1318 $m$ , 1175 $m$ , 1087 $m$ , 928 $m$ , 883 $w$ , 683 $m$ , 648 $w$ , 565 $w$ .

**Table S2.** Crystallographic Data and Structure Refinement for Complexes **4-6**.

|                                                              | <b>4 (CCDC 933907)</b>                                                                        | <b>5 (CCDC 933908)</b>                                                                        | <b>6 (CCDC 933909)</b>                                                                        |
|--------------------------------------------------------------|-----------------------------------------------------------------------------------------------|-----------------------------------------------------------------------------------------------|-----------------------------------------------------------------------------------------------|
| Empirical Formula                                            | C <sub>24</sub> H <sub>22</sub> Br <sub>2</sub> Cu <sub>2</sub> N <sub>8</sub> O <sub>4</sub> | C <sub>24</sub> H <sub>22</sub> Br <sub>2</sub> Cu <sub>2</sub> N <sub>8</sub> O <sub>4</sub> | C <sub>22</sub> H <sub>18</sub> Br <sub>2</sub> Cu <sub>2</sub> N <sub>8</sub> O <sub>4</sub> |
| Formula weight                                               | 773.40                                                                                        | 773.40                                                                                        | 745.34                                                                                        |
| Crystal system                                               | Triclinic                                                                                     | Triclinic                                                                                     | Monoclinic                                                                                    |
| Space group                                                  | <i>P</i> -1                                                                                   | <i>P</i> -1                                                                                   | <i>P</i> 2 <sub>1</sub> / <i>c</i>                                                            |
| <i>a</i> (Å)                                                 | 8.224(2)                                                                                      | 9.518(4)                                                                                      | 13.724(3)                                                                                     |
| <i>b</i> (Å)                                                 | 9.513(2)                                                                                      | 11.058(4)                                                                                     | 13.478(3)                                                                                     |
| <i>c</i> (Å)                                                 | 10.460(2)                                                                                     | 14.814(6)                                                                                     | 15.482(7)                                                                                     |
| $\alpha, \beta, \gamma$ (°)                                  | 64.03(3), 71.43(3), 83.95(3)                                                                  | 92.275(7), 105.925(7), 109.584(6)                                                             | 90, 117.98(2), 90                                                                             |
| <i>V</i> (Å <sup>3</sup> )                                   | 696.8(2)                                                                                      | 1397.6(10)                                                                                    | 2529.0(14)                                                                                    |
| <i>Z</i>                                                     | 1                                                                                             | 2                                                                                             | 4                                                                                             |
| <i>T</i> (K)                                                 | 153(2)                                                                                        | 296(2)                                                                                        | 153(2)                                                                                        |
| $\rho_{\text{calcd}}$ (g cm <sup>-3</sup> )                  | 1.843                                                                                         | 1.838                                                                                         | 1.958                                                                                         |
| Abs. coefficient (mm <sup>-1</sup> )                         | 4.440                                                                                         | 4.427                                                                                         | 4.889                                                                                         |
| <i>F</i> (000)                                               | 382                                                                                           | 764                                                                                           | 1464                                                                                          |
| $\theta$ Range (°)                                           | 2.27 < $\theta$ < 28.38                                                                       | 1.44 < $\theta$ < 28.23                                                                       | 1.68 < $\theta$ < 28.30                                                                       |
| Reflections collected                                        | 5161                                                                                          | 10226                                                                                         | 18375                                                                                         |
| unique reflns, <i>R</i> <sub>int</sub>                       | 3445, 0.0211                                                                                  | 6831, 0.0304                                                                                  | 6272, 0.0204                                                                                  |
| GOF on <i>F</i> <sup>2</sup>                                 | 1.034                                                                                         | 0.969                                                                                         | 1.057                                                                                         |
| Final <i>R</i> indices [ <i>I</i> > 2 $\sigma$ ( <i>I</i> )] | <i>R</i> <sup><i>aj</i></sup> = 0.0759, w <i>R</i> <sup><i>bj</i></sup> = 0.1943              | <i>R</i> <sup><i>aj</i></sup> = 0.0659, w <i>R</i> <sup><i>bj</i></sup> = 0.1619              | <i>R</i> <sup><i>aj</i></sup> = 0.0271, w <i>R</i> <sup><i>bj</i></sup> = 0.0656              |
| <i>R</i> indices (all data)                                  | <i>R</i> = 0.0843, w <i>R</i> = 0.1973                                                        | <i>R</i> = 0.1529, w <i>R</i> = 0.1906                                                        | <i>R</i> = 0.0426, w <i>R</i> = 0.0707                                                        |

a)  $R = \frac{\sum ||F_o| - |F_c||}{\sum |F_o|}$       b)  $wR = [\frac{\sum w(F_o^2 - F_c^2)^2}{\sum wF_o^4}]^{1/2}$

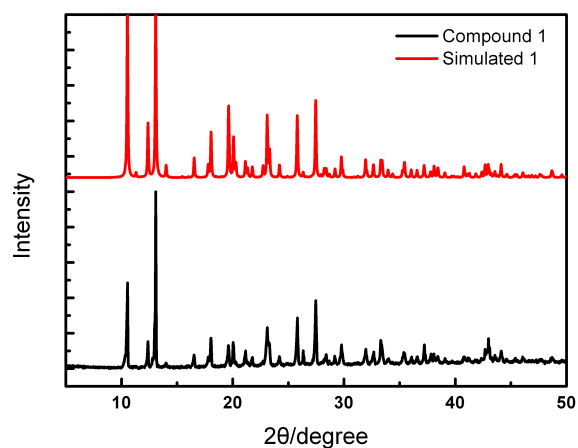

**Figure S4.** PXRD patterns and simulated data from Crystallographic Information File for compound **1**

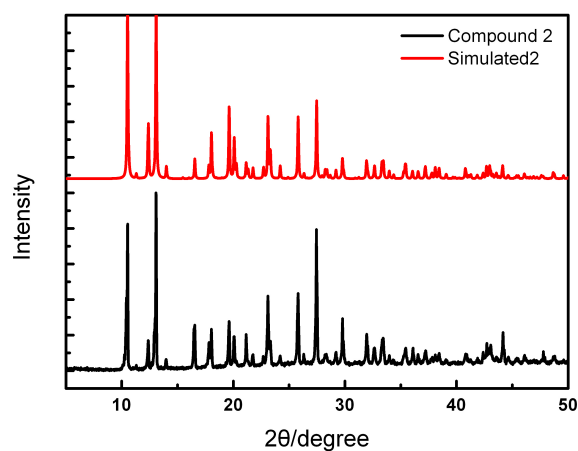

**Figure S5.** PXRD patterns and simulated data from Crystallographic Information File for compound **2**

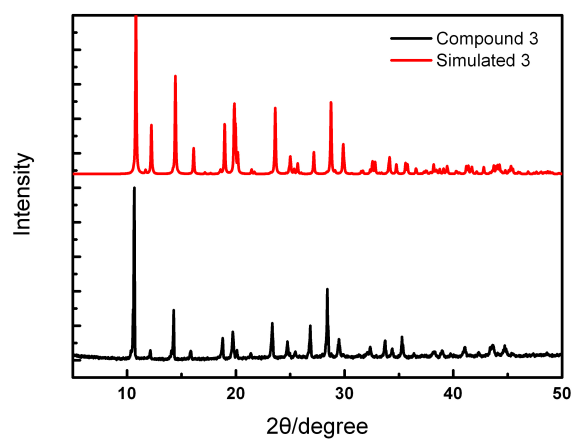

**Figure S6.** PXRD patterns and simulated data from Crystallographic Information File for compound **3**

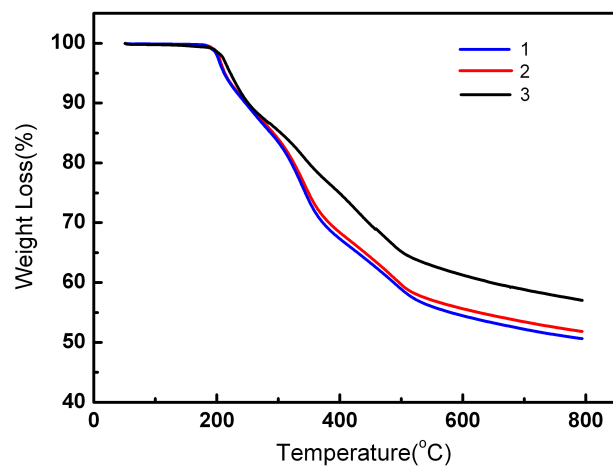

**Figure S7.** The TGA curves for compound 1-3.



**Table S3** Selected bond lengths [Å] and angles [°] for **1-3**

| Compound 1 |             |              |           |
|------------|-------------|--------------|-----------|
| Cu1-N1     | 1.9302(16)  | N1-Cu1-O3    | 82.31(6)  |
| Cu1-N2     | 1.9426(18)  | O2-Cu1-O3    | 159.62(6) |
| Cu1-N4 #1  | 2.475(2)    | N2-Cu1-O3    | 91.41(7)  |
| Cu1-O2     | 1.9332(13)  | N1-Cu1-N4 #2 | 90.49(8)  |
| Cu1-O3     | 2.0457(14)  | O2-Cu1-N4 #2 | 105.21(8) |
| N1-Cu1-O2  | 93.20(6)    | N2-Cu1-N4 #2 | 88.88(9)  |
| N1-Cu1-N2  | 173.61(7)   | O3-Cu1-N4 #2 | 94.74(8)  |
| O2-Cu1-N2  | 93.10(6)    |              |           |
| Compound 2 |             |              |           |
| Cu1-N1     | 1.9318(15)  | N1-Cu1-O3    | 82.26(6)  |
| Cu1-N2     | 1.9421(17)  | O2-Cu1-O3    | 159.60(6) |
| Cu1-N4 #1  | 2.473(2)    | N2-Cu1-O3    | 91.38(6)  |
| Cu1-O2     | 1.9352(13)  | N1-Cu1-N4 #2 | 90.57(8)  |
| Cu1-O3     | 2.0471(14)  | O2-Cu1-N4 #2 | 105.31(8) |
| N1-Cu1-O2  | 93.19(6)    | N2-Cu1-N4 #2 | 88.91(8)  |
| N1-Cu1-N2  | 173.55(7)   | O3-Cu1-N4 #2 | 94.65(8)  |
| O2-Cu1-N2  | 93.15(6)    |              |           |
| Compound 3 |             |              |           |
| Cu1-N1     | 1.9196(19)  | N1-Cu1-O3    | 82.05(8)  |
| Cu1-N2     | 1.928(2)    | N2-Cu1-O3    | 91.52(7)  |
| Cu1-N4 #1  | 2.359(2) #1 | O2-Cu1-O3    | 161.94(6) |
| Cu1-O2     | 1.9356(15)  | N1-Cu1-N4 #2 | 89.28(8)  |
| Cu1-O3     | 2.0412(16)  | N2-Cu1-N4 #2 | 92.07(8)  |
| N1-Cu1-N2  | 173.57(9)   | O2-Cu1-N4 #2 | 95.49(7)  |
| N1-Cu1-O2  | 93.41(8)    | O3-Cu1-N4 #2 | 101.89(7) |
| N2-Cu1-O2  | 92.72(7)    |              |           |

Symmetry transformations used to generate equivalent atoms: #1: 2-x, y+1/2, -z+1/2; #2: 2-x, y-1/2, -z+1/2

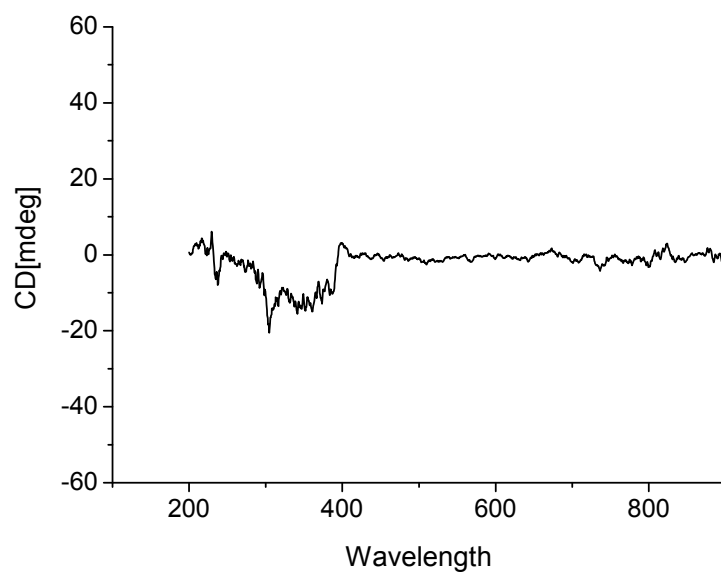

**Figure S8** The complex **3** was prepared under static (unstirred) condition, solid-state CD measurements for the result bulk materials
